# Supplementary material for: High-resolution rovibrational and rotational spectroscopy of the singly deuterated cyclopropenyl cation, c-C3H2D+
Source: Royal Society of Chemistry journal article supplement (doi:10.1039/d3fd00068k), 2023-01-01
Supplement: d3fd00068k1.zip [file d3fd00068k1.zip]

Supplementary Material:

High-resolution rovibrational and rotational  
spectroscopy of singly deuterated  
cyclopropenyl cation,  $\text{c-C}_3\text{H}_2\text{D}^+$

Divita Gupta,<sup>†</sup> Wesley G. D. P. Silva,<sup>†</sup> José L. Doménech,<sup>‡</sup> Eline Plaar,<sup>†</sup> Sven  
Thorwirth,<sup>†</sup> Stephan Schlemmer,<sup>†</sup> and Oskar Asvany<sup>\*,†</sup>

<sup>†</sup>*I. Physikalisches Institut, Universität zu Köln Zùlpicher Str. 77, 50937 Köln, Germany*

<sup>‡</sup>*Instituto de Estructura de la Materia, IEM-CSIC, Serrano 123, 28006 Madrid, Spain*

E-mail: asvany@ph1.uni-koeln.de

Transition Frequencies and Residuals (in wavenumbers) for the First  
Vibrationally Excited State Fit

| Observed  | Obs-Calc | v' | J' | Ka' | Kc' |   | v'' | J'' | Ka'' | Kc'' |
|-----------|----------|----|----|-----|-----|---|-----|-----|------|------|
| 3160.1209 | 0.0004   | 1  | 3  | 1   | 2   | - | 0   | 4   | 3    | 1    |
| 3160.6526 | 0.0001   | 1  | 5  | 3   | 3   | - | 0   | 6   | 3    | 4    |
| 3160.8028 | 0.0031   | 1  | 4  | 3   | 1   | - | 0   | 5   | 3    | 2    |
| 3160.9529 | 0.0020   | 1  | 2  | 1   | 2   | - | 0   | 3   | 3    | 1    |
| 3161.5372 | 0.0017   | 1  | 5  | 1   | 4   | - | 0   | 6   | 1    | 5    |
| 3161.5470 | 0.0018   | 1  | 6  | 0   | 6   | - | 0   | 7   | 0    | 7    |
| 3161.5470 | 0.0018   | 1  | 6  | 1   | 6   | - | 0   | 7   | 1    | 7    |
| 3161.7347 | -0.0001  | 1  | 4  | 3   | 2   | - | 0   | 5   | 3    | 3    |
| 3161.9547 | 0.0013   | 1  | 2  | 0   | 2   | - | 0   | 3   | 2    | 1    |
| 3161.9702 | 0.0010   | 1  | 2  | 1   | 1   | - | 0   | 3   | 3    | 0    |
| 3162.4331 | 0.0013   | 1  | 3  | 3   | 0   | - | 0   | 4   | 3    | 1    |
| 3162.4617 | 0.0011   | 1  | 4  | 1   | 3   | - | 0   | 5   | 1    | 4    |
| 3162.4908 | 0.0015   | 1  | 5  | 1   | 5   | - | 0   | 6   | 1    | 6    |
| 3162.4908 | 0.0016   | 1  | 5  | 0   | 5   | - | 0   | 6   | 0    | 6    |
| 3162.4990 | 0.0012   | 1  | 3  | 2   | 1   | - | 0   | 4   | 2    | 2    |
| 3162.5041 | 0.0007   | 1  | 4  | 2   | 3   | - | 0   | 5   | 2    | 4    |
| 3162.9534 | 0.0007   | 1  | 3  | 3   | 1   | - | 0   | 4   | 3    | 2    |
| 3163.3498 | 0.0005   | 1  | 3  | 1   | 2   | - | 0   | 4   | 1    | 3    |
| 3163.4326 | 0.0014   | 1  | 4  | 1   | 4   | - | 0   | 5   | 1    | 5    |
| 3163.5022 | -0.0023  | 1  | 3  | 2   | 2   | - | 0   | 4   | 2    | 3    |
| 3163.9320 | -0.0006  | 1  | 2  | 2   | 0   | - | 0   | 3   | 2    | 1    |
| 3164.2014 | -0.0007  | 1  | 1  | 0   | 1   | - | 0   | 2   | 2    | 0    |
| 3164.3047 | -0.0002  | 1  | 2  | 1   | 1   | - | 0   | 3   | 1    | 2    |

|           |         |   |   |   |   |   |   |   |   |   |
|-----------|---------|---|---|---|---|---|---|---|---|---|
| 3164.3616 | 0.0007  | 1 | 5 | 1 | 5 | - | 0 | 5 | 1 | 4 |
| 3164.3662 | 0.0001  | 1 | 3 | 0 | 3 | - | 0 | 4 | 0 | 4 |
| 3164.3729 | 0.0001  | 1 | 3 | 1 | 3 | - | 0 | 4 | 1 | 4 |
| 3165.2300 | 0.0005  | 1 | 5 | 1 | 4 | - | 0 | 5 | 3 | 3 |
| 3165.2789 | 0.0007  | 1 | 4 | 0 | 4 | - | 0 | 4 | 2 | 3 |
| 3165.2865 | -0.0004 | 1 | 2 | 0 | 2 | - | 0 | 3 | 0 | 3 |
| 3165.3246 | 0.0002  | 1 | 2 | 1 | 2 | - | 0 | 3 | 1 | 3 |
| 3165.3368 | 0.0006  | 1 | 4 | 1 | 4 | - | 0 | 4 | 1 | 3 |
| 3165.5457 | -0.0005 | 1 | 1 | 1 | 0 | - | 0 | 2 | 1 | 1 |
| 3165.9567 | 0.0007  | 1 | 4 | 1 | 3 | - | 0 | 4 | 3 | 2 |
| 3166.1406 | 0.0008  | 1 | 3 | 0 | 3 | - | 0 | 3 | 2 | 2 |
| 3166.1937 | -0.0000 | 1 | 1 | 0 | 1 | - | 0 | 2 | 0 | 2 |
| 3166.3181 | 0.0000  | 1 | 1 | 1 | 1 | - | 0 | 2 | 1 | 2 |
| 3166.3438 | 0.0004  | 1 | 3 | 1 | 2 | - | 0 | 3 | 3 | 1 |
| 3166.3687 | 0.0009  | 1 | 3 | 1 | 3 | - | 0 | 3 | 1 | 2 |
| 3166.5814 | 0.0009  | 1 | 4 | 2 | 3 | - | 0 | 4 | 2 | 2 |
| 3166.8213 | 0.0005  | 1 | 2 | 0 | 2 | - | 0 | 2 | 2 | 1 |
| 3166.8855 | 0.0022  | 1 | 5 | 3 | 3 | - | 0 | 5 | 3 | 2 |
| 3167.2517 | -0.0001 | 1 | 0 | 0 | 0 | - | 0 | 1 | 0 | 1 |
| 3167.3958 | 0.0004  | 1 | 2 | 1 | 2 | - | 0 | 2 | 1 | 1 |
| 3167.6008 | -0.0032 | 1 | 3 | 2 | 2 | - | 0 | 3 | 2 | 1 |
| 3167.8399 | -0.0016 | 1 | 4 | 3 | 2 | - | 0 | 4 | 3 | 1 |
| 3168.1715 | -0.0009 | 1 | 1 | 1 | 1 | - | 0 | 1 | 1 | 0 |
| 3168.2828 | -0.0004 | 1 | 2 | 2 | 1 | - | 0 | 2 | 2 | 0 |
| 3168.3748 | 0.0001  | 1 | 3 | 3 | 1 | - | 0 | 3 | 3 | 0 |
| 3168.4029 | 0.0012  | 1 | 5 | 5 | 1 | - | 0 | 5 | 5 | 0 |
| 3168.4136 | 0.0008  | 1 | 4 | 4 | 1 | - | 0 | 4 | 4 | 0 |

|           |         |   |   |   |   |   |   |   |   |   |
|-----------|---------|---|---|---|---|---|---|---|---|---|
| 3168.4549 | 0.0013  | 1 | 5 | 5 | 0 | - | 0 | 5 | 5 | 1 |
| 3168.5410 | 0.0006  | 1 | 4 | 4 | 0 | - | 0 | 4 | 4 | 1 |
| 3168.6553 | 0.0007  | 1 | 3 | 3 | 0 | - | 0 | 3 | 3 | 1 |
| 3168.7990 | -0.0011 | 1 | 2 | 2 | 0 | - | 0 | 2 | 2 | 1 |
| 3168.8807 | -0.0022 | 1 | 5 | 4 | 1 | - | 0 | 5 | 4 | 2 |
| 3168.9434 | -0.0005 | 1 | 1 | 1 | 0 | - | 0 | 1 | 1 | 1 |
| 3169.1752 | 0.0016  | 1 | 4 | 3 | 1 | - | 0 | 4 | 3 | 2 |
| 3169.4651 | 0.0003  | 1 | 3 | 2 | 1 | - | 0 | 3 | 2 | 2 |
| 3169.7096 | -0.0003 | 1 | 2 | 1 | 1 | - | 0 | 2 | 1 | 2 |
| 3169.8744 | -0.0008 | 1 | 1 | 0 | 1 | - | 0 | 0 | 0 | 0 |
| 3170.1039 | 0.0001  | 1 | 5 | 3 | 2 | - | 0 | 5 | 3 | 3 |
| 3170.2742 | -0.0005 | 1 | 2 | 2 | 1 | - | 0 | 2 | 0 | 2 |
| 3170.4606 | -0.0010 | 1 | 4 | 2 | 2 | - | 0 | 4 | 2 | 3 |
| 3170.7100 | -0.0004 | 1 | 3 | 3 | 1 | - | 0 | 3 | 1 | 2 |
| 3170.7161 | -0.0007 | 1 | 3 | 1 | 2 | - | 0 | 3 | 1 | 3 |
| 3170.7932 | 0.0000  | 1 | 2 | 1 | 2 | - | 0 | 1 | 1 | 1 |
| 3170.9226 | -0.0007 | 1 | 2 | 0 | 2 | - | 0 | 1 | 0 | 1 |
| 3170.9340 | -0.0034 | 1 | 3 | 2 | 2 | - | 0 | 3 | 0 | 3 |
| 3171.0687 | -0.0016 | 1 | 4 | 3 | 2 | - | 0 | 4 | 1 | 3 |
| 3171.2624 | -0.0010 | 1 | 6 | 3 | 3 | - | 0 | 6 | 3 | 4 |
| 3171.3778 | -0.0002 | 1 | 4 | 1 | 3 | - | 0 | 3 | 3 | 0 |
| 3171.3817 | -0.0015 | 1 | 5 | 4 | 2 | - | 0 | 5 | 2 | 3 |
| 3171.4133 | -0.0000 | 1 | 4 | 4 | 1 | - | 0 | 4 | 2 | 2 |
| 3171.5546 | -0.0003 | 1 | 5 | 2 | 3 | - | 0 | 5 | 2 | 4 |
| 3171.5635 | -0.0007 | 1 | 2 | 1 | 1 | - | 0 | 1 | 1 | 0 |
| 3171.7187 | -0.0000 | 1 | 4 | 1 | 3 | - | 0 | 4 | 1 | 4 |
| 3171.7609 | -0.0008 | 1 | 5 | 3 | 3 | - | 0 | 5 | 1 | 4 |

|           |         |   |   |   |   |   |   |   |   |   |
|-----------|---------|---|---|---|---|---|---|---|---|---|
| 3171.7728 | -0.0001 | 1 | 3 | 1 | 3 | - | 0 | 2 | 1 | 2 |
| 3171.8124 | -0.0003 | 1 | 3 | 0 | 3 | - | 0 | 2 | 0 | 2 |
| 3172.4680 | -0.0034 | 1 | 3 | 2 | 2 | - | 0 | 2 | 2 | 1 |
| 3172.6078 | -0.0007 | 1 | 6 | 3 | 4 | - | 0 | 6 | 1 | 5 |
| 3172.6600 | 0.0000  | 1 | 5 | 1 | 4 | - | 0 | 5 | 1 | 5 |
| 3172.6703 | -0.0000 | 1 | 5 | 2 | 4 | - | 0 | 5 | 0 | 5 |
| 3172.7040 | 0.0002  | 1 | 4 | 1 | 4 | - | 0 | 3 | 1 | 3 |
| 3172.7113 | 0.0002  | 1 | 4 | 0 | 4 | - | 0 | 3 | 0 | 3 |
| 3172.7871 | -0.0008 | 1 | 3 | 1 | 2 | - | 0 | 2 | 1 | 1 |
| 3172.9009 | -0.0016 | 1 | 2 | 2 | 0 | - | 0 | 1 | 0 | 1 |
| 3173.1462 | 0.0000  | 1 | 3 | 2 | 1 | - | 0 | 2 | 2 | 0 |
| 3173.5469 | -0.0006 | 1 | 4 | 2 | 3 | - | 0 | 3 | 2 | 2 |
| 3173.5778 | -0.0000 | 1 | 6 | 1 | 5 | - | 0 | 6 | 1 | 6 |
| 3173.6197 | 0.0005  | 1 | 5 | 1 | 5 | - | 0 | 4 | 1 | 4 |
| 3173.6197 | -0.0006 | 1 | 5 | 0 | 5 | - | 0 | 4 | 0 | 4 |
| 3173.7135 | -0.0003 | 1 | 4 | 1 | 3 | - | 0 | 3 | 1 | 2 |
| 3174.0632 | -0.0012 | 1 | 4 | 3 | 2 | - | 0 | 3 | 3 | 1 |
| 3174.4875 | -0.0007 | 1 | 7 | 1 | 6 | - | 0 | 7 | 1 | 7 |
| 3174.5186 | 0.0002  | 1 | 5 | 2 | 4 | - | 0 | 4 | 2 | 3 |
| 3174.5297 | 0.0000  | 1 | 6 | 0 | 6 | - | 0 | 5 | 0 | 5 |
| 3174.5297 | 0.0002  | 1 | 6 | 1 | 6 | - | 0 | 5 | 1 | 5 |
| 3174.5604 | -0.0006 | 1 | 4 | 2 | 2 | - | 0 | 3 | 2 | 1 |
| 3174.5653 | 0.0002  | 1 | 5 | 1 | 4 | - | 0 | 4 | 1 | 3 |
| 3174.5967 | 0.0010  | 1 | 4 | 3 | 1 | - | 0 | 3 | 3 | 0 |
| 3175.0995 | 0.0004  | 1 | 3 | 3 | 0 | - | 0 | 2 | 1 | 1 |
| 3175.1377 | 0.0000  | 1 | 3 | 2 | 1 | - | 0 | 2 | 0 | 2 |
| 3175.2562 | -0.0010 | 1 | 5 | 3 | 3 | - | 0 | 4 | 3 | 2 |

|           |         |   |   |   |   |   |   |   |   |   |
|-----------|---------|---|---|---|---|---|---|---|---|---|
| 3175.4361 | -0.0009 | 1 | 7 | 1 | 7 | - | 0 | 6 | 1 | 6 |
| 3175.4361 | -0.0009 | 1 | 7 | 0 | 7 | - | 0 | 6 | 0 | 6 |
| 3175.4403 | 0.0001  | 1 | 6 | 2 | 5 | - | 0 | 5 | 2 | 4 |
| 3175.4496 | 0.0001  | 1 | 6 | 1 | 5 | - | 0 | 5 | 1 | 4 |
| 3175.5775 | -0.0012 | 1 | 5 | 4 | 2 | - | 0 | 4 | 4 | 1 |
| 3175.6321 | 0.0001  | 1 | 5 | 2 | 3 | - | 0 | 4 | 2 | 2 |
| 3175.9322 | -0.0011 | 1 | 5 | 4 | 1 | - | 0 | 4 | 4 | 0 |
| 3176.1160 | 0.0006  | 1 | 3 | 3 | 1 | - | 0 | 2 | 1 | 2 |
| 3176.2112 | 0.0006  | 1 | 5 | 3 | 2 | - | 0 | 4 | 3 | 1 |
| 3176.3026 | 0.0001  | 1 | 6 | 3 | 4 | - | 0 | 5 | 3 | 3 |
| 3176.3401 | -0.0018 | 1 | 8 | 1 | 8 | - | 0 | 7 | 1 | 7 |
| 3176.3401 | -0.0018 | 1 | 8 | 0 | 8 | - | 0 | 7 | 0 | 7 |
| 3176.3479 | 0.0015  | 1 | 7 | 2 | 6 | - | 0 | 6 | 2 | 5 |
| 3176.3479 | -0.0000 | 1 | 7 | 1 | 6 | - | 0 | 6 | 1 | 5 |
| 3176.4616 | 0.0004  | 1 | 6 | 2 | 4 | - | 0 | 5 | 2 | 3 |
| 3176.9325 | 0.0012  | 1 | 4 | 3 | 1 | - | 0 | 3 | 1 | 2 |
| 3177.0276 | 0.0005  | 1 | 6 | 5 | 2 | - | 0 | 5 | 5 | 1 |
| 3177.2234 | -0.0023 | 1 | 6 | 5 | 1 | - | 0 | 5 | 5 | 0 |
| 3177.4940 | -0.0003 | 1 | 6 | 3 | 3 | - | 0 | 5 | 3 | 2 |
| 3177.5173 | 0.0007  | 1 | 4 | 4 | 0 | - | 0 | 3 | 2 | 1 |
| 3177.7160 | 0.0018  | 1 | 6 | 4 | 2 | - | 0 | 5 | 4 | 1 |
| 3177.8950 | 0.0007  | 1 | 4 | 2 | 2 | - | 0 | 3 | 0 | 3 |

Ground State Rotational Transition Frequencies and Residuals (in MHz)

| Observed    | Obs-Calc | v' | J' | Ka' | Kc' |   | v'' | J'' | Ka'' | Kc'' |
|-------------|----------|----|----|-----|-----|---|-----|-----|------|------|
| 90293.2964  | 0.0283   | 0  | 2  | 1   | 1   | - | 0   | 1   | 1    | 0    |
| 96791.8844  | 0.0235   | 0  | 3  | 1   | 3   | - | 0   | 2   | 1    | 2    |
| 97972.8381  | 0.0190   | 0  | 3  | 0   | 3   | - | 0   | 2   | 0    | 2    |
| 118087.0068 | 0.0090   | 0  | 3  | 2   | 2   | - | 0   | 2   | 2    | 1    |
| 125054.3480 | 0.0071   | 0  | 4  | 1   | 4   | - | 0   | 3   | 1    | 3    |
| 180356.9896 | -0.0024  | 0  | 5  | 2   | 4   | - | 0   | 4   | 2    | 3    |
| 180733.6130 | -0.0005  | 0  | 6  | 1   | 6   | - | 0   | 5   | 1    | 5    |
| 180737.9305 | 0.0021   | 0  | 6  | 0   | 6   | - | 0   | 5   | 0    | 5    |
| 181026.5963 | -0.0007  | 0  | 4  | 2   | 2   | - | 0   | 3   | 2    | 1    |
| 181735.1075 | -0.0001  | 0  | 5  | 1   | 4   | - | 0   | 4   | 1    | 3    |
| 182399.3395 | -0.0002  | 0  | 4  | 3   | 1   | - | 0   | 3   | 3    | 0    |
| 197358.1392 | 0.0001   | 0  | 3  | 3   | 0   | - | 0   | 2   | 1    | 1    |
| 202928.5429 | 0.0001   | 0  | 5  | 3   | 3   | - | 0   | 4   | 3    | 2    |
| 208526.1590 | 0.0003   | 0  | 7  | 1   | 7   | - | 0   | 6   | 1    | 6    |
| 208882.1686 | 0.0033   | 0  | 6  | 1   | 5   | - | 0   | 5   | 1    | 4    |
| 231191.0231 | 0.0001   | 0  | 5  | 3   | 2   | - | 0   | 4   | 3    | 1    |

Ground state combination differences and residuals (in wavenumbers)

| Observed | Obs-Calc | v' | J' | Ka' | Kc' |   | v'' | J'' | Ka'' | Kc'' |
|----------|----------|----|----|-----|-----|---|-----|-----|------|------|
| 3.6807   | -0.0008  | 0  | 2  | 0   | 2   | - | 0   | 0   | 0    | 0    |
| 1.9922   | 0.0007   | 0  | 2  | 2   | 0   | - | 0   | 2   | 0    | 2    |
| 1.8534   | -0.0009  | 0  | 2  | 1   | 2   | - | 0   | 1   | 1    | 0    |
| 3.3977   | -0.0001  | 0  | 2  | 1   | 1   | - | 0   | 1   | 1    | 1    |
| 4.1013   | -0.0011  | 0  | 2  | 2   | 1   | - | 0   | 1   | 0    | 1    |
| 1.5349   | 0.0008   | 0  | 3  | 0   | 3   | - | 0   | 2   | 2    | 1    |
| 3.3318   | -0.0016  | 0  | 3  | 2   | 1   | - | 0   | 3   | 0    | 3    |
| 4.1019   | -0.0005  | 0  | 2  | 2   | 1   | - | 0   | 1   | 0    | 1    |
| 4.8670   | -0.0005  | 0  | 3  | 2   | 1   | - | 0   | 2   | 2    | 1    |
| 1.9915   | -0.0001  | 0  | 2  | 2   | 0   | - | 0   | 2   | 0    | 2    |
| 1.8539   | -0.0004  | 0  | 2  | 1   | 2   | - | 0   | 1   | 1    | 0    |
| 5.4049   | -0.0001  | 0  | 3  | 1   | 2   | - | 0   | 2   | 1    | 2    |
| 2.3345   | -0.0012  | 0  | 3  | 3   | 0   | - | 0   | 3   | 1    | 2    |
| 3.3974   | -0.0003  | 0  | 2  | 1   | 1   | - | 0   | 1   | 1    | 1    |
| 2.0712   | 0.0001   | 0  | 3  | 1   | 3   | - | 0   | 2   | 1    | 1    |
| 4.3717   | -0.0017  | 0  | 3  | 3   | 1   | - | 0   | 3   | 1    | 3    |
| 1.5341   | 0.0000   | 0  | 3  | 0   | 3   | - | 0   | 2   | 2    | 1    |
| 3.3332   | -0.0003  | 0  | 3  | 2   | 1   | - | 0   | 3   | 0    | 3    |
| 4.0986   | -0.0008  | 0  | 4  | 2   | 3   | - | 0   | 3   | 2    | 1    |
| 5.6719   | -0.0010  | 0  | 3  | 2   | 2   | - | 0   | 2   | 0    | 2    |
| 1.7744   | 0.0007   | 0  | 4  | 0   | 4   | - | 0   | 3   | 2    | 2    |
| 1.9915   | -0.0000  | 0  | 2  | 2   | 0   | - | 0   | 2   | 0    | 2    |
| 3.6811   | -0.0003  | 0  | 3  | 2   | 2   | - | 0   | 2   | 2    | 0    |
| 6.9661   | -0.0008  | 0  | 4  | 2   | 2   | - | 0   | 3   | 2    | 2    |



|        |         |   |   |   |   |   |   |   |   |   |
|--------|---------|---|---|---|---|---|---|---|---|---|
| 5.4040 | -0.0010 | 0 | 3 | 1 | 2 | - | 0 | 2 | 1 | 2 |
| 1.9958 | 0.0008  | 0 | 4 | 1 | 4 | - | 0 | 3 | 1 | 2 |
| 5.4060 | 0.0010  | 0 | 3 | 1 | 2 | - | 0 | 2 | 1 | 2 |
| 2.3352 | -0.0005 | 0 | 3 | 3 | 0 | - | 0 | 3 | 1 | 2 |
| 5.4214 | -0.0006 | 0 | 4 | 3 | 2 | - | 0 | 3 | 3 | 0 |
| 2.0710 | -0.0001 | 0 | 3 | 1 | 3 | - | 0 | 2 | 1 | 1 |
| 4.3723 | -0.0011 | 0 | 3 | 3 | 1 | - | 0 | 3 | 1 | 3 |
| 2.9940 | -0.0001 | 0 | 4 | 1 | 3 | - | 0 | 3 | 3 | 1 |
| 3.2288 | 0.0001  | 0 | 4 | 3 | 1 | - | 0 | 4 | 1 | 3 |
| 6.4442 | -0.0003 | 0 | 3 | 3 | 1 | - | 0 | 2 | 1 | 1 |
| 6.2222 | -0.0006 | 0 | 4 | 3 | 1 | - | 0 | 3 | 3 | 1 |
| 7.4324 | -0.0005 | 0 | 4 | 2 | 3 | - | 0 | 3 | 0 | 3 |
| 3.3347 | 0.0013  | 0 | 3 | 2 | 1 | - | 0 | 3 | 0 | 3 |
| 4.0998 | 0.0004  | 0 | 4 | 2 | 3 | - | 0 | 3 | 2 | 1 |
| 8.9763 | 0.0002  | 0 | 4 | 4 | 1 | - | 0 | 3 | 2 | 1 |
| 6.9655 | -0.0014 | 0 | 4 | 2 | 2 | - | 0 | 3 | 2 | 2 |
| 4.0773 | 0.0002  | 0 | 5 | 2 | 4 | - | 0 | 4 | 2 | 2 |
| 2.9997 | -0.0008 | 0 | 4 | 4 | 0 | - | 0 | 4 | 2 | 2 |
| 2.3356 | -0.0001 | 0 | 3 | 3 | 0 | - | 0 | 3 | 1 | 2 |
| 0.3409 | 0.0002  | 0 | 3 | 3 | 0 | - | 0 | 4 | 1 | 4 |
| 5.7620 | -0.0008 | 0 | 4 | 3 | 2 | - | 0 | 4 | 1 | 4 |
| 3.4950 | -0.0004 | 0 | 5 | 1 | 4 | - | 0 | 4 | 3 | 2 |
| 2.3359 | 0.0002  | 0 | 3 | 3 | 0 | - | 0 | 3 | 1 | 2 |
| 5.4215 | -0.0006 | 0 | 4 | 3 | 2 | - | 0 | 3 | 3 | 0 |
| 8.3724 | -0.0015 | 0 | 5 | 3 | 2 | - | 0 | 4 | 3 | 2 |
| 7.3671 | -0.0004 | 0 | 4 | 1 | 3 | - | 0 | 3 | 1 | 3 |
| 1.9043 | -0.0008 | 0 | 5 | 1 | 5 | - | 0 | 4 | 1 | 3 |

|         |         |   |   |   |   |   |   |   |   |   |
|---------|---------|---|---|---|---|---|---|---|---|---|
| 2.9945  | 0.0004  | 0 | 4 | 1 | 3 | - | 0 | 3 | 3 | 1 |
| 3.2287  | -0.0000 | 0 | 4 | 3 | 1 | - | 0 | 4 | 1 | 3 |
| 6.1053  | -0.0015 | 0 | 5 | 3 | 3 | - | 0 | 4 | 3 | 1 |
| 1.8483  | 0.0002  | 0 | 5 | 0 | 5 | - | 0 | 4 | 2 | 3 |
| 4.1958  | 0.0003  | 0 | 5 | 2 | 3 | - | 0 | 4 | 4 | 1 |
| 11.1288 | -0.0022 | 0 | 6 | 0 | 6 | - | 0 | 4 | 0 | 4 |
| 4.0775  | 0.0004  | 0 | 5 | 2 | 4 | - | 0 | 4 | 2 | 2 |
| 7.0515  | 0.0011  | 0 | 5 | 4 | 2 | - | 0 | 4 | 4 | 0 |
| 9.2580  | -0.0001 | 0 | 5 | 1 | 4 | - | 0 | 4 | 1 | 4 |
| 1.8708  | -0.0009 | 0 | 6 | 1 | 6 | - | 0 | 5 | 1 | 4 |
| 3.4953  | -0.0002 | 0 | 5 | 1 | 4 | - | 0 | 4 | 3 | 2 |
| 4.8754  | -0.0031 | 0 | 5 | 3 | 2 | - | 0 | 5 | 1 | 4 |
| 6.2330  | 0.0021  | 0 | 6 | 3 | 4 | - | 0 | 5 | 3 | 2 |
| 1.9053  | 0.0002  | 0 | 5 | 1 | 5 | - | 0 | 4 | 1 | 3 |
| 7.4300  | -0.0005 | 0 | 5 | 3 | 3 | - | 0 | 5 | 1 | 5 |
| 3.6928  | -0.0012 | 0 | 6 | 1 | 5 | - | 0 | 5 | 3 | 3 |
| 6.1073  | 0.0005  | 0 | 5 | 3 | 3 | - | 0 | 4 | 3 | 1 |
| 12.9827 | -0.0018 | 0 | 7 | 0 | 7 | - | 0 | 5 | 0 | 5 |
| 1.8718  | 0.0001  | 0 | 6 | 1 | 6 | - | 0 | 5 | 1 | 4 |
| 6.2316  | 0.0007  | 0 | 6 | 3 | 4 | - | 0 | 5 | 3 | 2 |
| 12.9827 | -0.0016 | 0 | 7 | 1 | 7 | - | 0 | 5 | 1 | 5 |
| 3.6948  | 0.0008  | 0 | 6 | 1 | 5 | - | 0 | 5 | 3 | 3 |
| 1.8605  | 0.0007  | 0 | 7 | 1 | 7 | - | 0 | 6 | 1 | 5 |
